# Supplementary material for: A Graph Memory Neural Network for Sea Surface Temperature Prediction
Source: MDPI journal article supplement (doi:10.3390/rs15143539), 2023-07-14

# Supplementary Materials

for

## A Graph Memory Neural Network for Sea Surface Temperature Prediction

Shuchen Liang <sup>1,2</sup>, Anming Zhao<sup>1,2</sup>, Mengjiao Qin <sup>1,2</sup>, Linshu Hu <sup>1,2,\*</sup>, Sensen Wu <sup>1,2</sup>,  
Zhenhong Du <sup>1,2</sup> and Renyi Liu <sup>1,2</sup>

<sup>1</sup> School of Earth Sciences, Zhejiang University, 866 Yuhangtang Rd, Hangzhou 310058, China

<sup>2</sup> Zhejiang Provincial Key Laboratory of Geographic Information Science, 866 Yuhangtang Rd, Hangzhou 310058, China

\* Correspondence: hulinshu1010@zju.edu.cn

### Contents of this file

Figure S1

### Introduction

Figure S1 shows the GMNN prediction results for SST on February 26, 2016, in 12 subregions.

Figure S1. GMNN prediction results for SST on February 26, 2016, in 12 subregions: (a) Subregion 3; (b) Subregion 4; (c) Subregion 11; (d) Subregion 15; (e) Subregion 18; (f) Subregion 22; (g) Subregion 27; (h) Subregion 30; (i) Subregion 32; (j) Subregion 36; (k) Subregion 40; (l) Subregion 41.

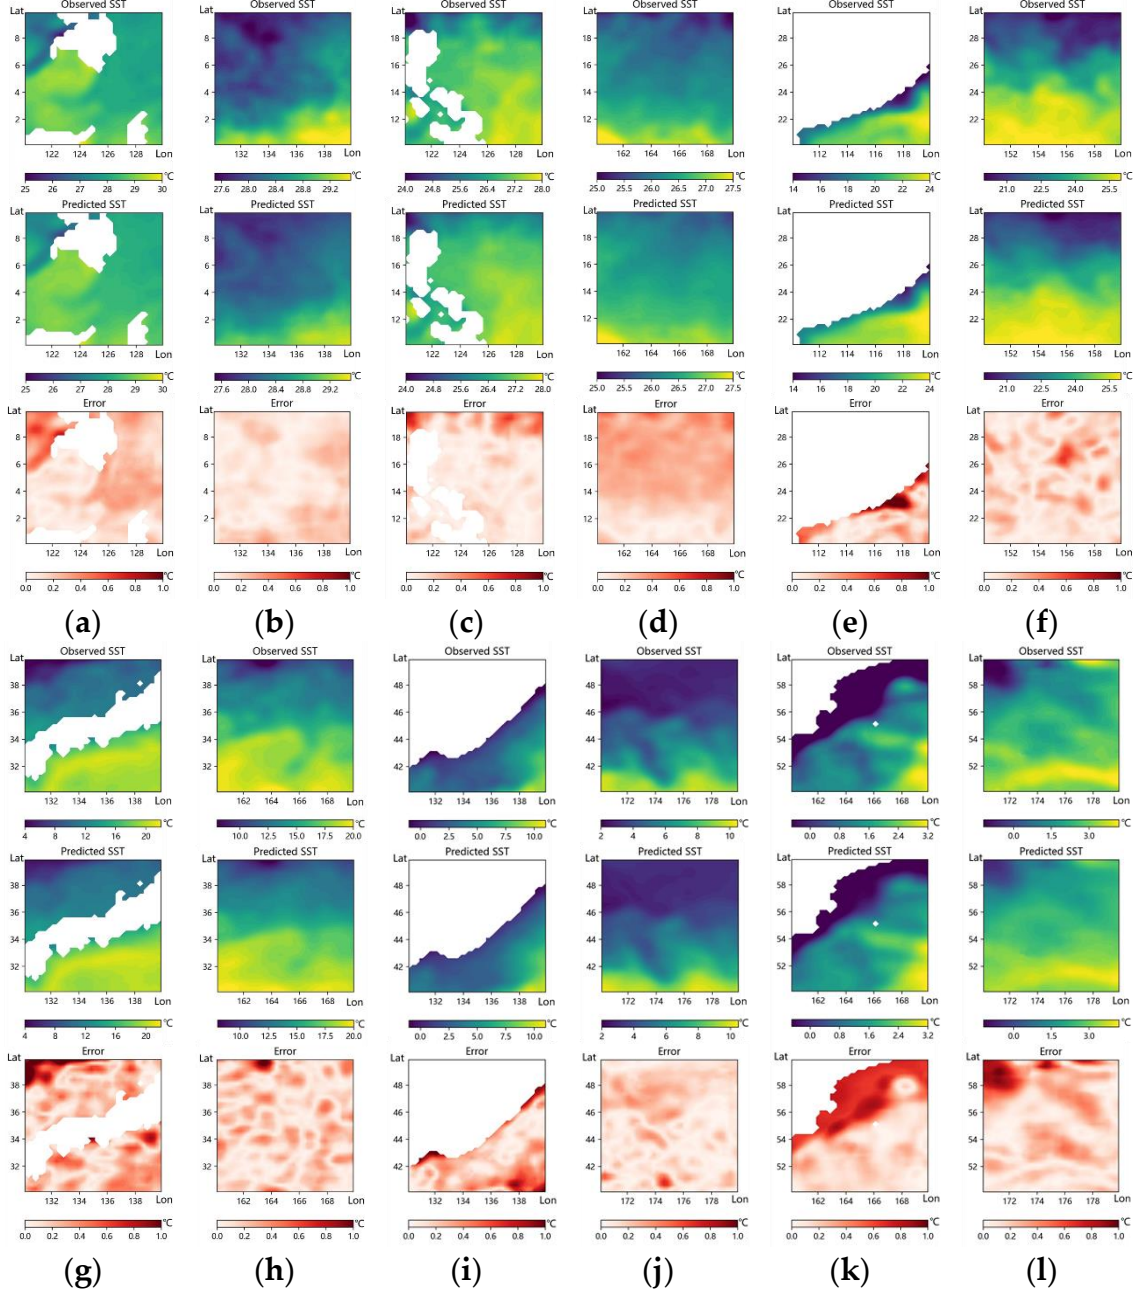

Supplement: s1 [file s1]
